# Supplementary material
Source: Springer Nature journal article supplement (https://www.springermedizin.de/resource/supplementary/12970_2009_120_MOESM3_ESM.pdf/9594432)

a.

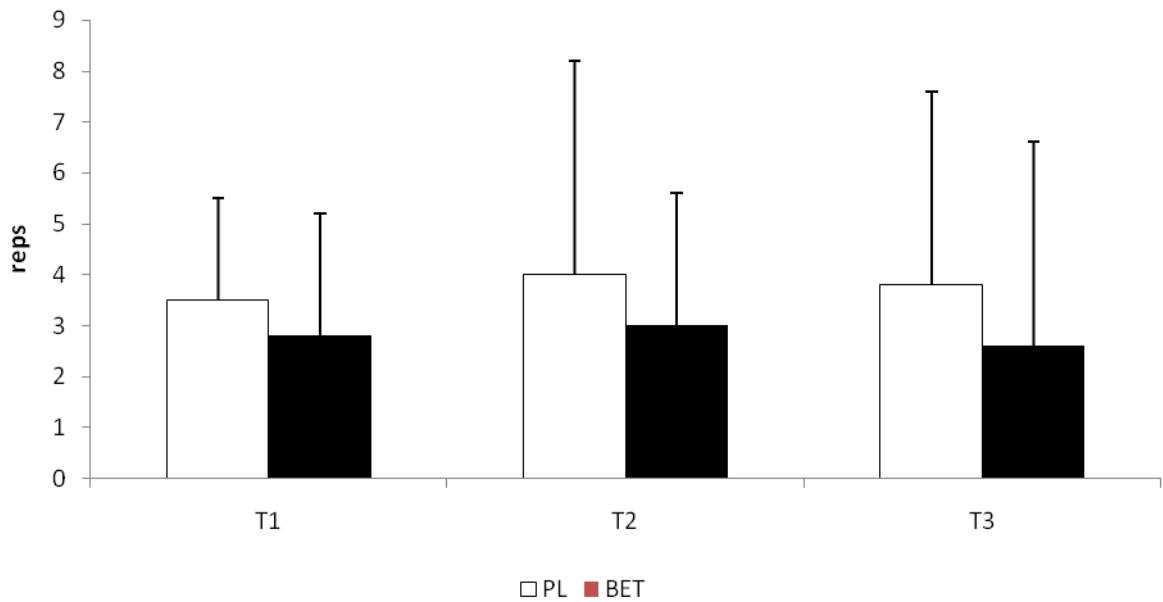

b.

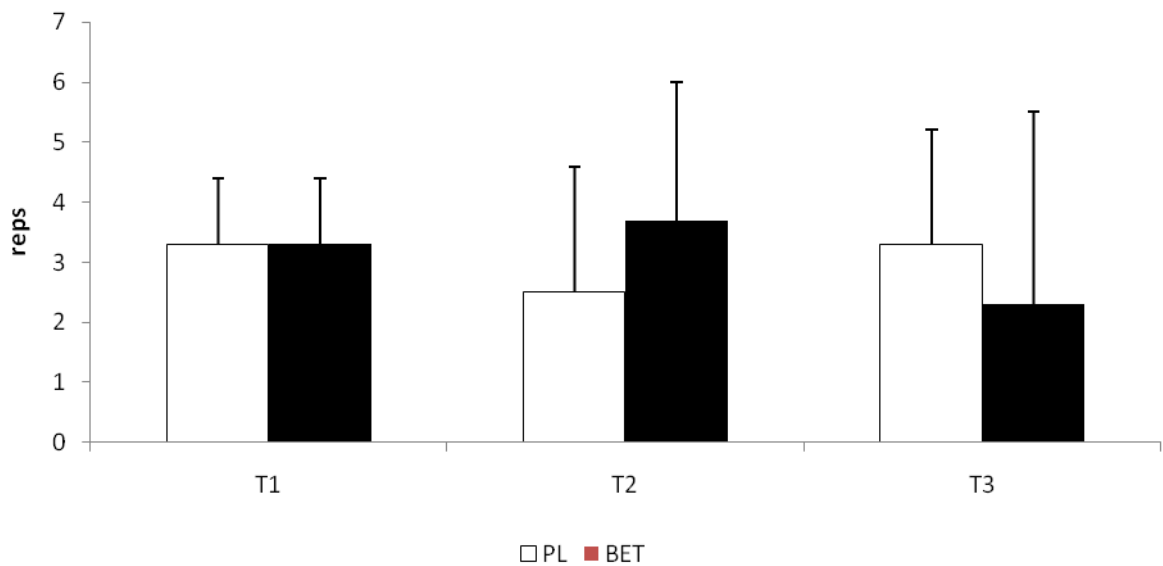

Supplement: MOESM3 [file 9594432]
